# Supplementary material for: Direct observation of a cooperative mechanism in the adsorption of heavy metal ions to thiolated surface by in-situ surface plasmon resonance measurements
Source: Royal Society of Chemistry journal article supplement (doi:10.1039/b500652j), 2005-01-01
Supplement: b500652j.pdf [file b500652j.pdf]

## Supplementary data

### Experimental details

#### Chemicals

Potassium tetrachloroplatinate ( $K_2PtCl_4$ , Riedel de Haen) was used to prepare the solution of  $Pt^{2+}$ . 1,6-Hexanedithiol ( $HS(CH_2)_6SH$ , HDT, Aldrich) was used as purchased. The water used was purified using a Milli-Q<sup>TM</sup> Millipore system.

#### The preparation of HDT self-assembled monolayer on gold thin film.

Microscope slide glasses (1-inch  $\times$  1-inch SF10) were immersed in a piranha solution ( $H_2SO_4 : H_2O_2 = 7:3$  v/v) for the purification. The glass substrate were rinsed several times with the copious amount of DI water and ethanol and, then, dried. The 50-nm gold thin film was prepared by a thermal evaporation with a 5-nm Cr adhesion layer. The SAM of HDT on gold substrate was formed by the treatment with 1 mM HDT ethanolic solution for 4 hrs. The formation of HDT monolayer was monitored by in-situ SPR measurements. The gold substrate with the HDT monolayer was attached to an SF10 prism with index matching oil (Cargille Laboratories Inc., certified refractive index liquids,  $n = 1.730 \pm 0.0005$ ). A Teflon cell was attached to the gold substrate. The 635-nm He-Ne diode laser (Power Technology Inc.) was p-polarized and focused with a lens through the prism onto the gold substrate. Both the prism and the gold substrate were mounted on a rotating plate to control the angle of the incident light. The reflectance was measured with a photo-power meter (Oriol). The changes in  $Pt^{2+}$  concentration after the adsorption of  $Pt^{2+}$  to a thiolated gold substrate in these experiments are negligible, because the adsorption surface area is limited (about  $8 \times 10^{-5}$  mm<sup>2</sup>).

#### The estimation of the dielectric constant and thickness of the full-adsorbed $Pt^{2+}$ layer.

We considered the immersion of the HDT-gold substrate into 1 mM  $Pt^{2+}$  solution for 12 hr as the fully saturated status of the HDT-gold substrate with  $Pt^{2+}$  (the immersion time of 12 hr is expected to be enough for the saturation).

#### Calculation details

SPR angle shift for both cases (one is the fixed thickness and the other is the fixed dielectric constant) was calculated using the Fresnel equations (using SPR software: Winspall version 2.20, Max-Planck-Institute for Polymer Research, Mainz, Germany). Fig. 1 (upper figure) represents the simulation results of SPR angle shift. Normalized SPR angle shifts were obtained from the following equation.

$$\text{Normalized } \Delta\theta_{SPR} = \frac{\Delta\theta_{SPR}^{Instant}}{\Delta\theta_{SPR}^{Final}}$$

The maximum SPR angle shift was obtained from SPR measurements for the fully saturated HDT layer with  $Pt^{2+}$ .

For spherical inclusions, the effective medium dielectric constant can be calculated from the following equation

$$\frac{(\epsilon_{eff} - \epsilon_4)}{(\epsilon_{eff} + 2\epsilon_4)} = \beta f \text{ where } \beta = \frac{(\epsilon_3 - \epsilon_4)}{(\epsilon_3 + 2\epsilon_4)}$$

We assumed that the filling factor  $f$  of the adsorbed  $Pt^{2+}$  layer reaches the value  $f \sim 1$ , when the HDT layer was saturated with  $Pt^{2+}$  ion. (Strictly speaking, the filling factor  $f$ , being 0.74 at maximum in cubic or hexagonal close packed geometry for considering  $Pt^{2+}$  as a uniformly sized spheres)

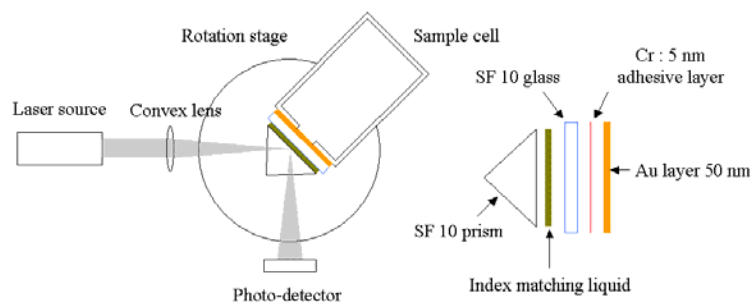

Fig. S1 The schematic configuration of surface plasmon resonance (SPR) measurements in the present study.

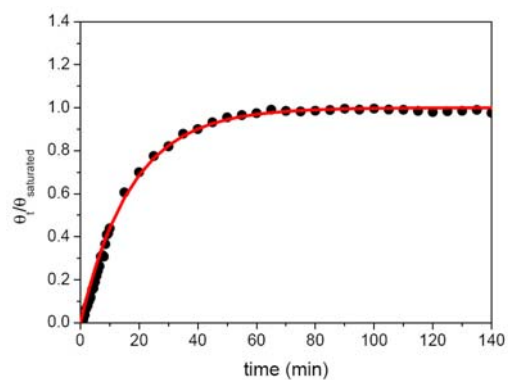

Fig. S2 SPR curve of 1,6-hexanedithiol on a gold substrate as a function of time.
